# Supplementary material for: Energies and selectivities for anion binding as a function of host conformational preorganisationElectronic supplementary information (ESI) available: NMR data and binding isotherms. See http://www.rsc.org/suppdata/cc/b2/b200605g/
Source: Royal Society of Chemistry journal article supplement (doi:10.1039/b200605g), 2002-03-13
Supplement: b200605g.pdf [file b200605g.pdf]

$^1\text{H}$ -NMR-spectrum of host **2** ( $\text{CDCl}_3$ , 500 MHz)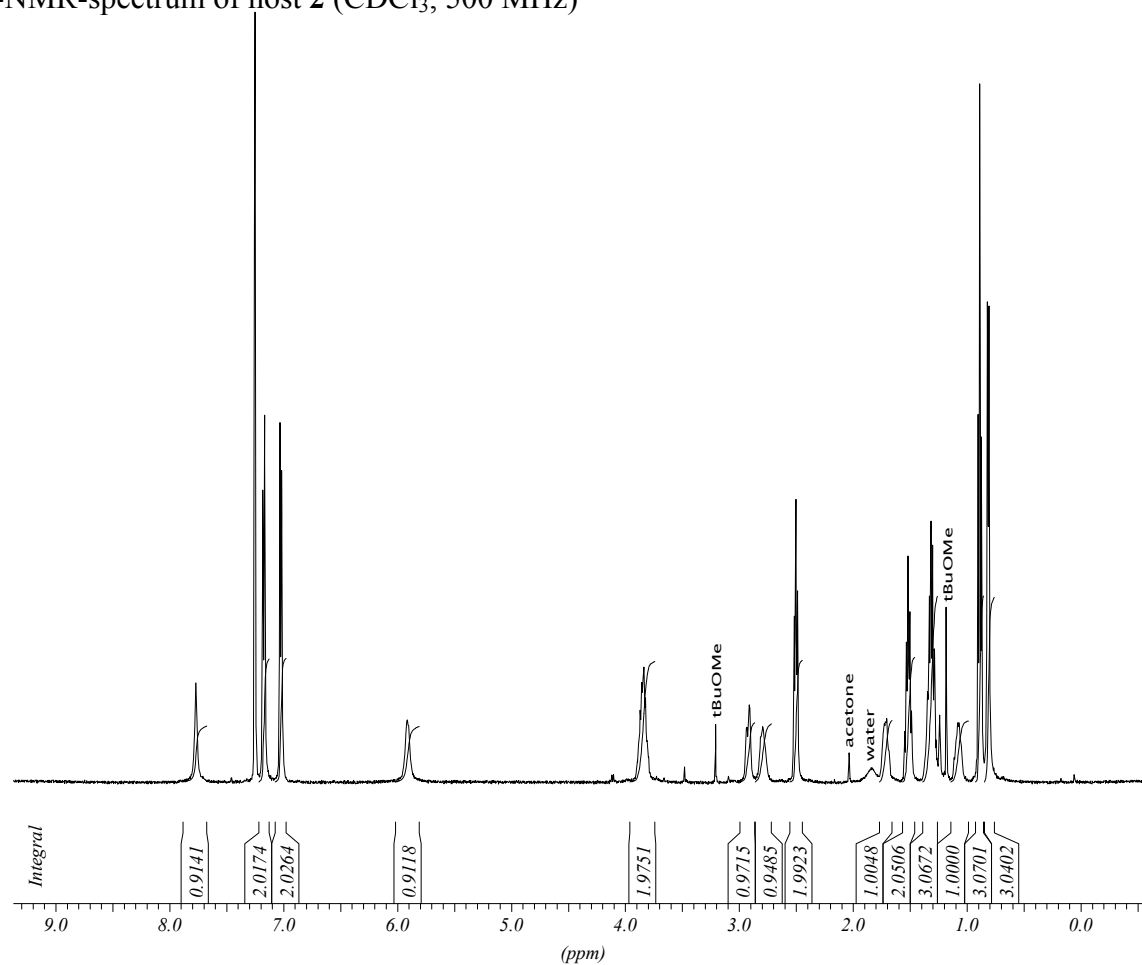 $^{13}\text{C}$ -NMR-spectrum of host **2** ( $\text{CDCl}_3$ , 125 MHz)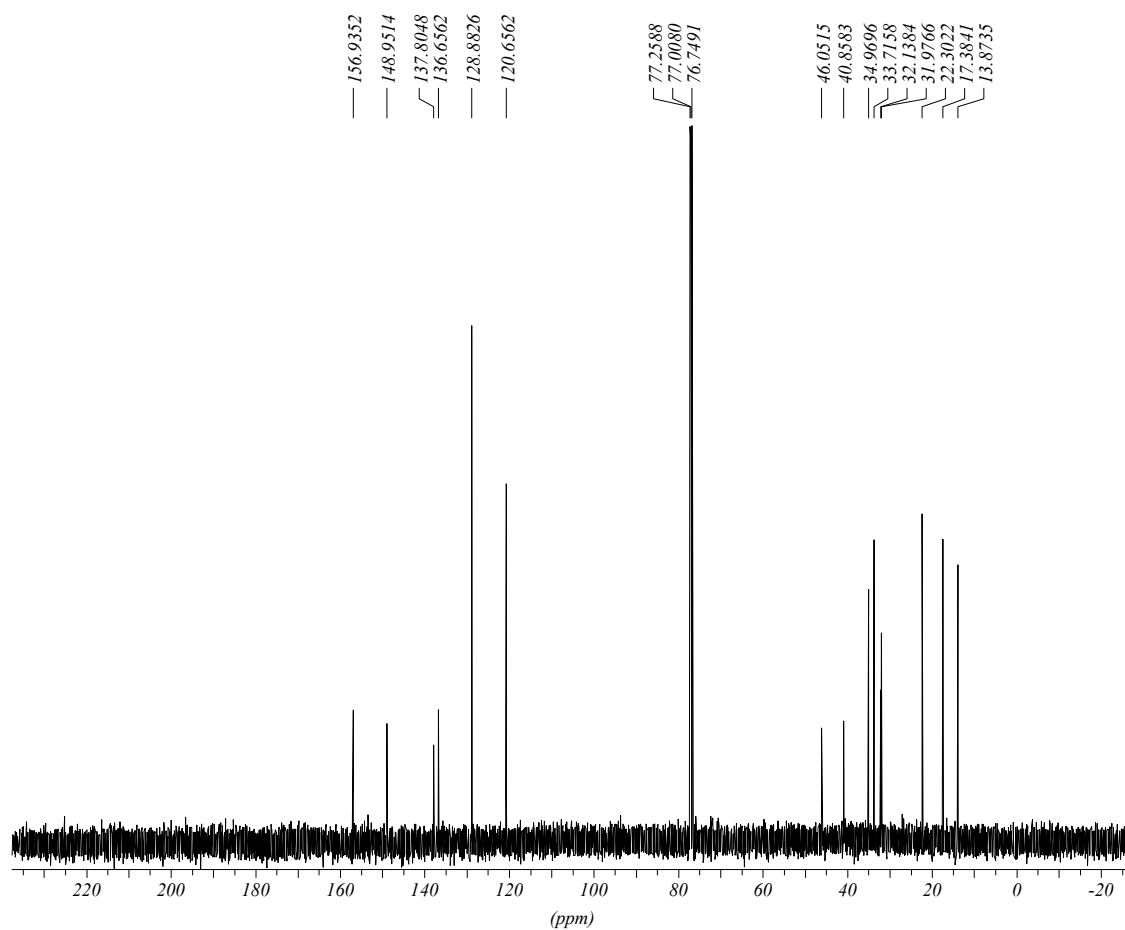

$^1\text{H}$ -NMR-spectrum of host **3** ( $\text{CDCl}_3$ , 500 MHz)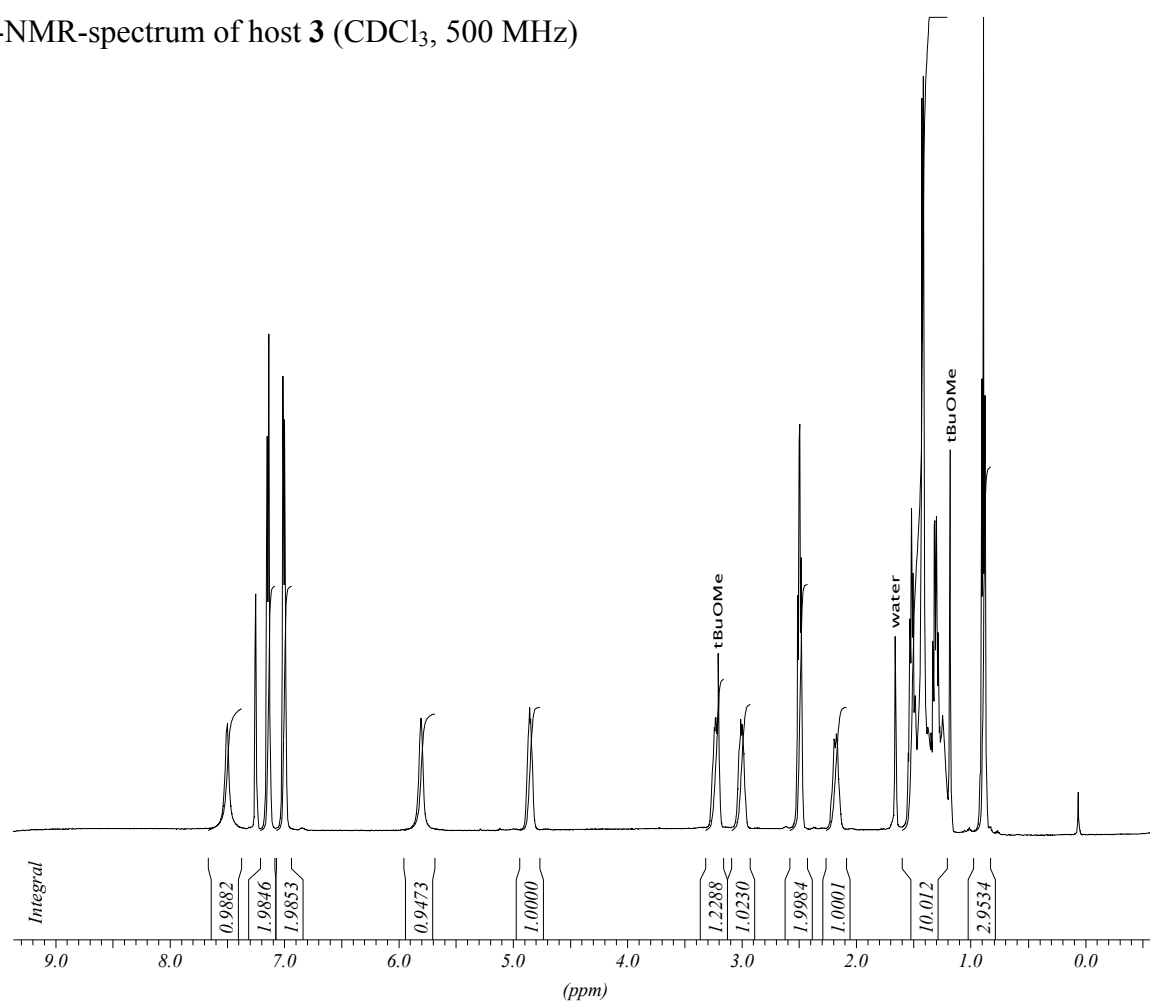 $^{13}\text{C}$ -NMR-spectrum of host **3** ( $\text{CDCl}_3$ , 125 MHz)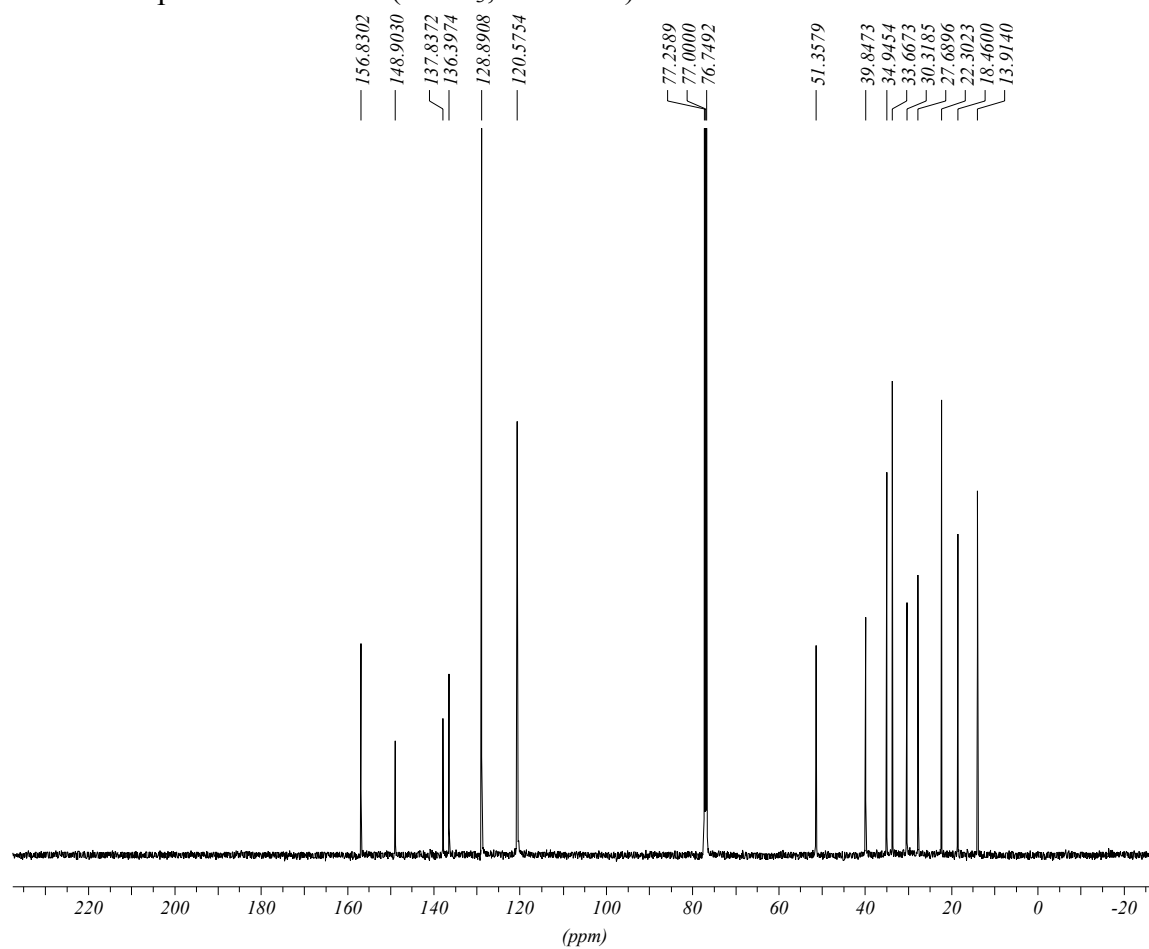

$^1\text{H}$ -NMR-spectrum of receptor **4** ( $\text{CDCl}_3$ , 500 MHz)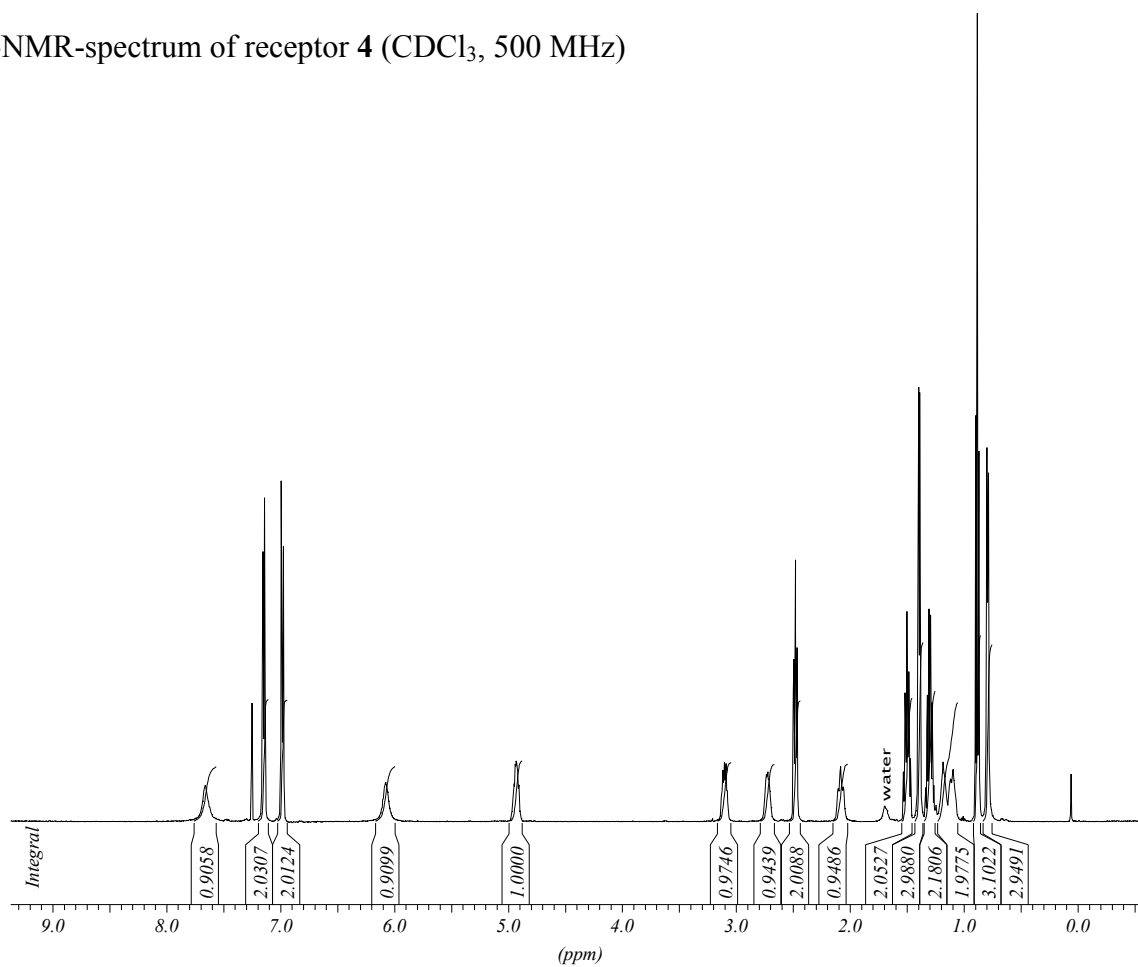 $^{13}\text{C}$ -NMR-spectrum of receptor **4** ( $\text{CDCl}_3$ , 500 MHz)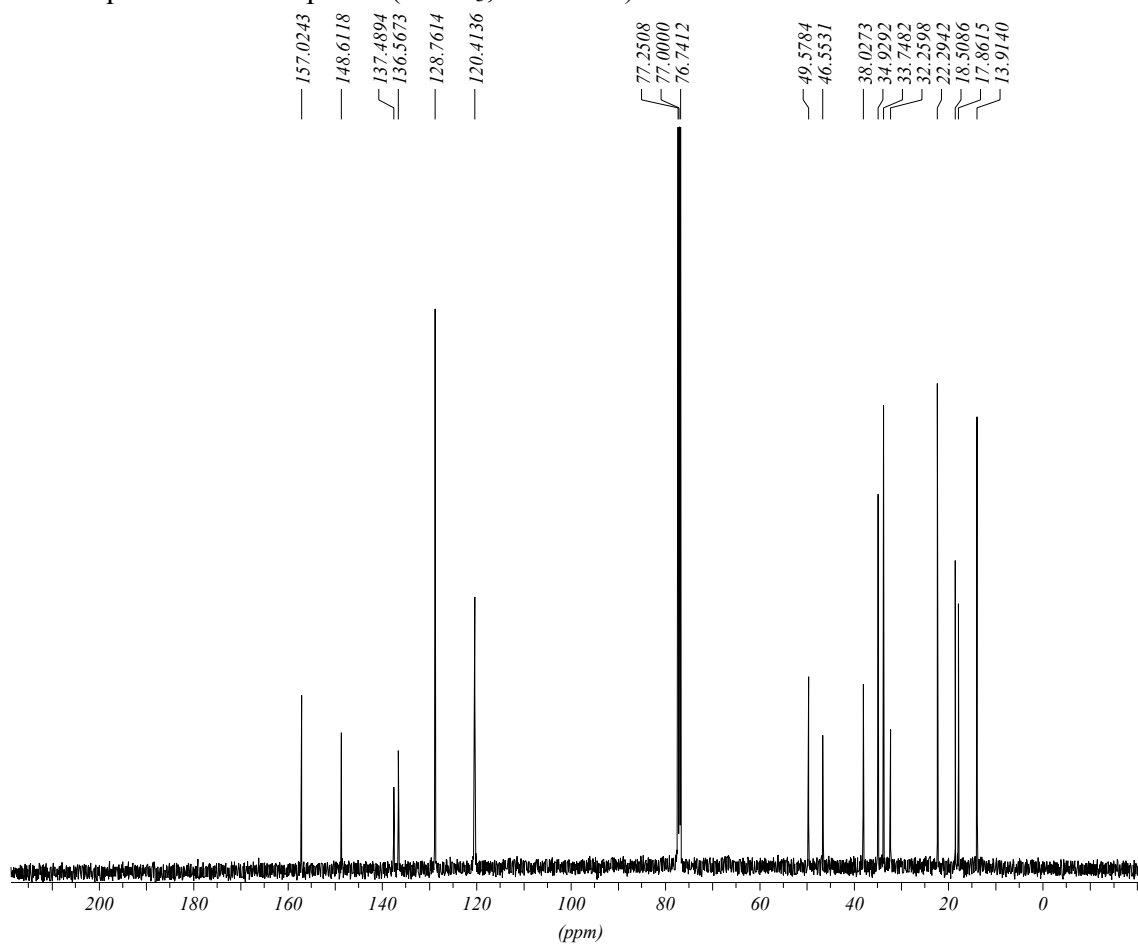

Host **2** / NBu<sub>4</sub>Cl (CDCl<sub>3</sub>, 300 K) – [2]<sub>initial</sub> : 1.0 mM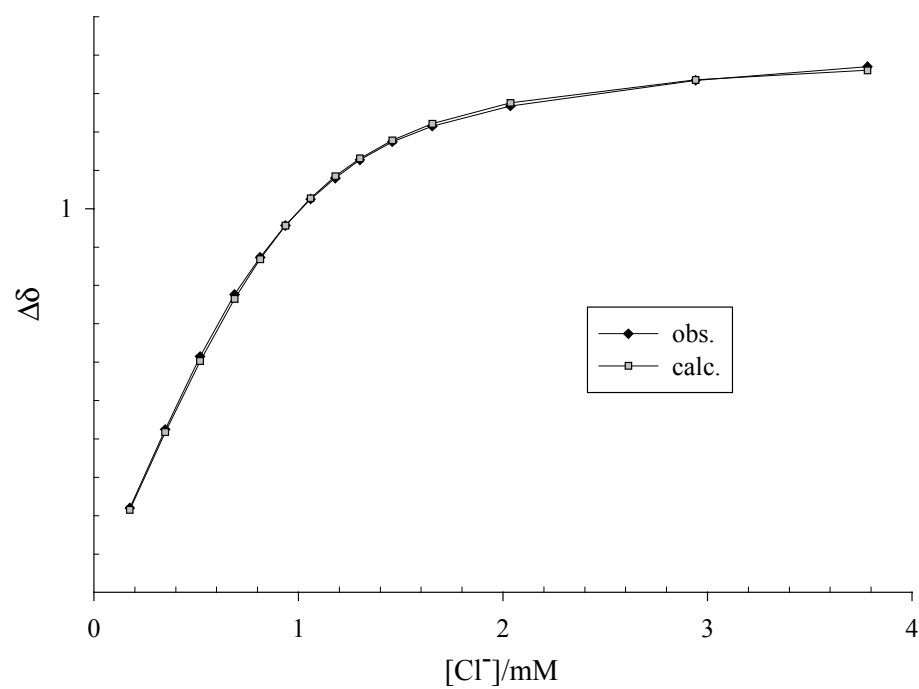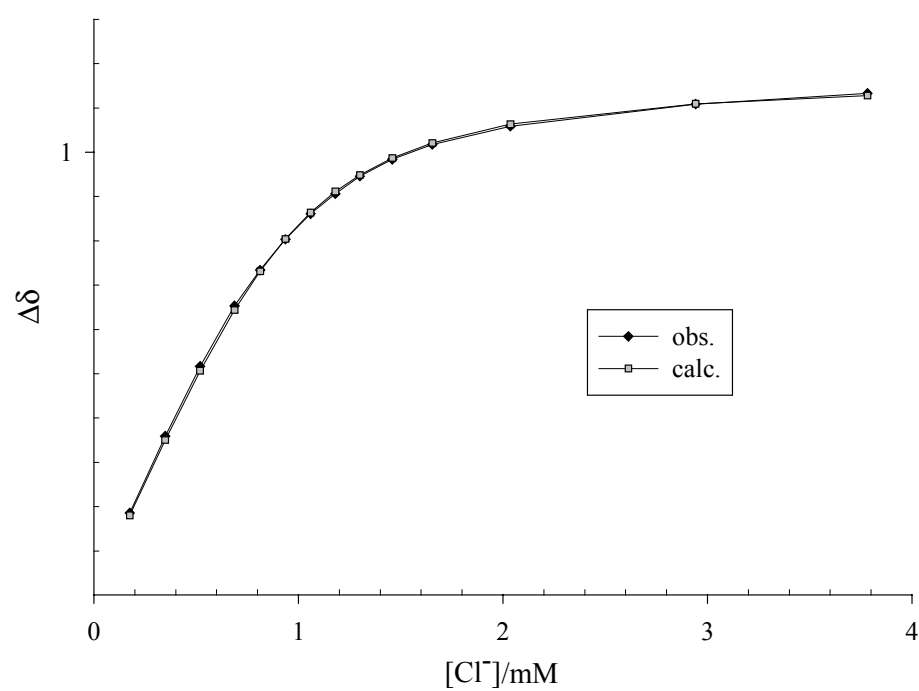

| Proton                                                          | upfield NH         | downfield          | mean                      |
|-----------------------------------------------------------------|--------------------|--------------------|---------------------------|
| $K_{\text{ass } 1:1}/\text{M}^{-1}$ (Std.Err/ $\text{M}^{-1}$ ) | 7780 ( $\pm 293$ ) | 7006 ( $\pm 260$ ) | <b>7393</b> ( $\pm 277$ ) |

Host **2** / NBu<sub>4</sub>Br (CDCl<sub>3</sub>, 300 K) – [2]<sub>initial</sub>: 1.0 mM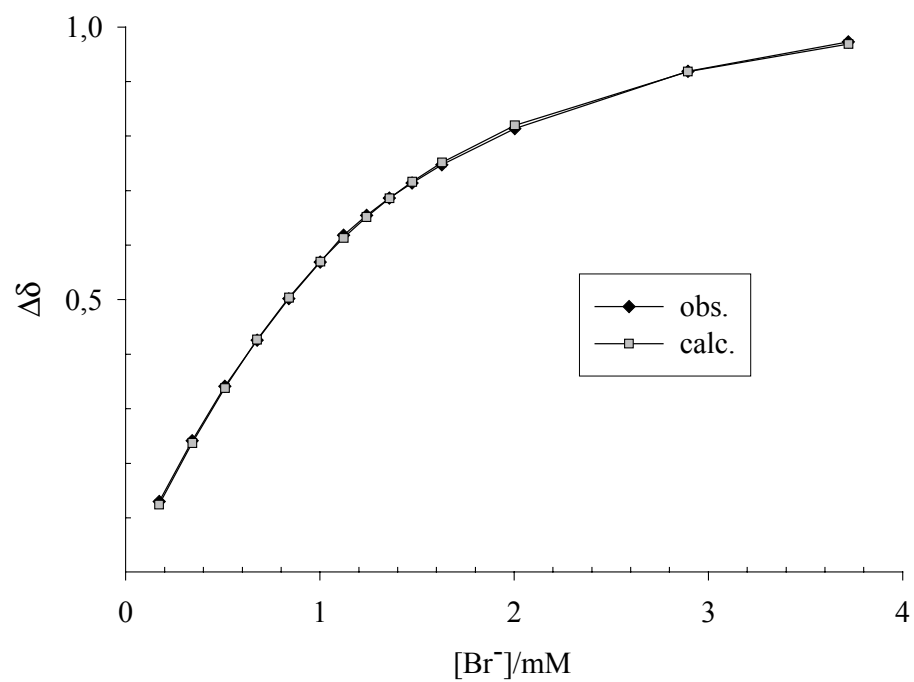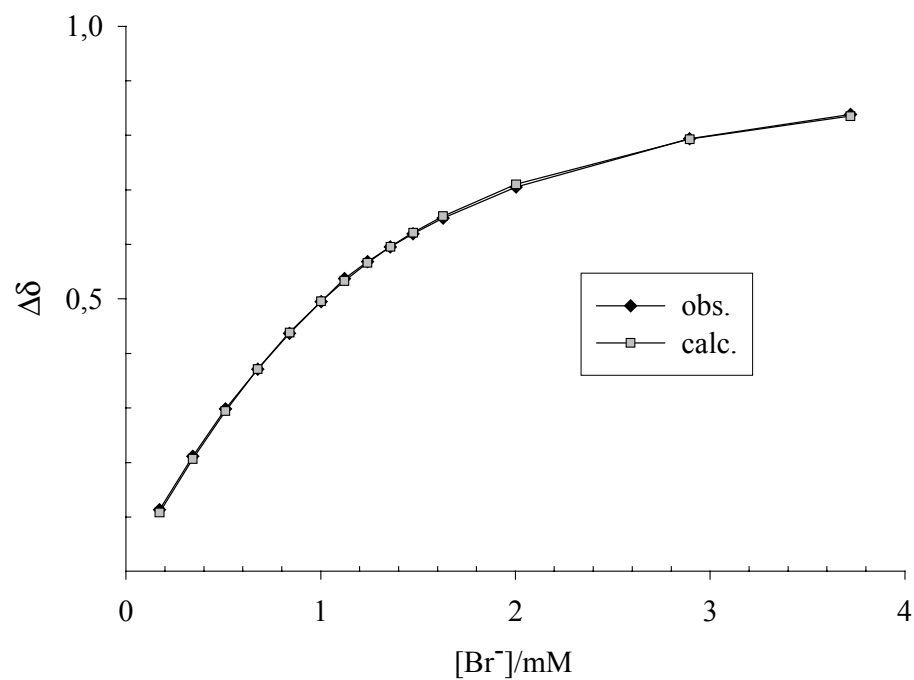

| Proton                                                          | upfield NH        | downfield         | mean                              |
|-----------------------------------------------------------------|-------------------|-------------------|-----------------------------------|
| $K_{\text{ass } 1:1}/\text{M}^{-1}$ (Std.Err/ $\text{M}^{-1}$ ) | 2030 ( $\pm 45$ ) | 1938 ( $\pm 42$ ) | <b>1984 (<math>\pm 44</math>)</b> |

Host **2** / NBu<sub>4</sub>NO<sub>3</sub> (CDCl<sub>3</sub>, 300 K) – [2]<sub>initial</sub> : 1.0 mM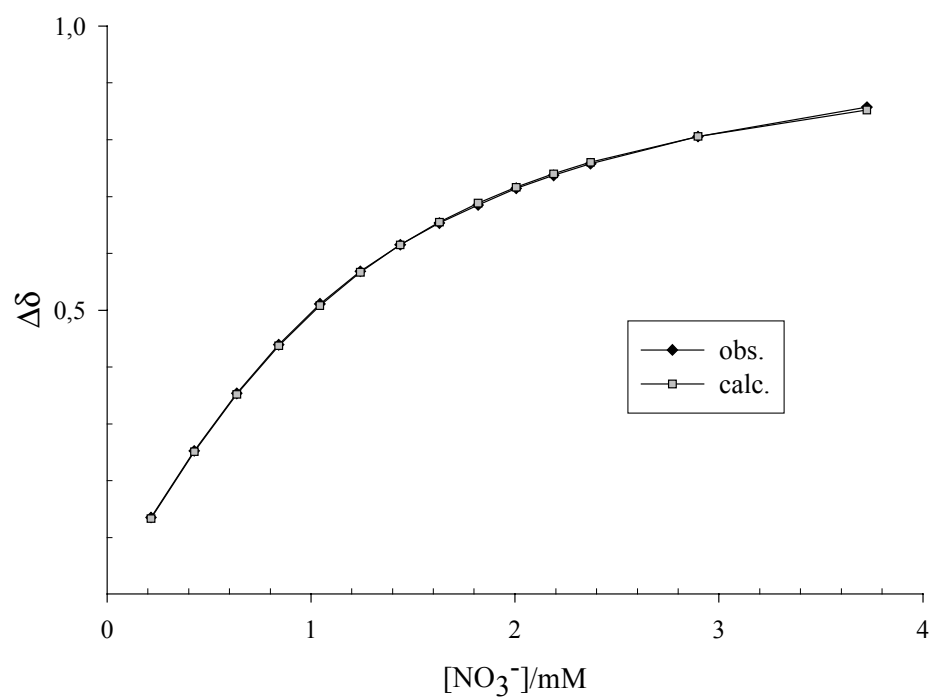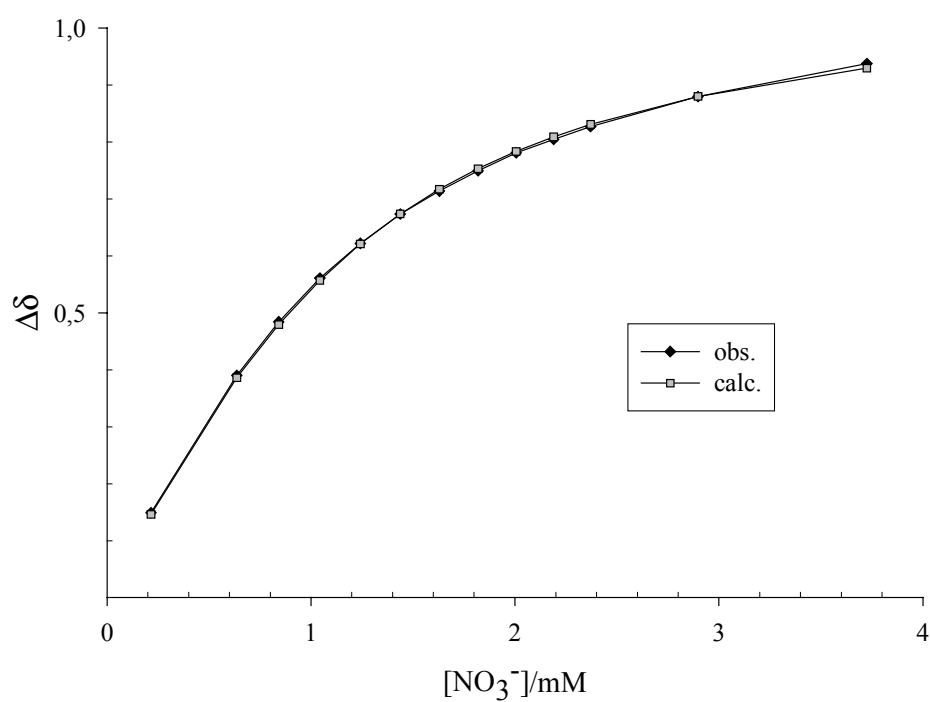

| Proton                                                           | upfield NH        | downfield         | mean                              |
|------------------------------------------------------------------|-------------------|-------------------|-----------------------------------|
| $K_{\text{ass } 1:1}/\text{M}^{-1}$ (Std.Err./ $\text{M}^{-1}$ ) | 1863 ( $\pm 51$ ) | 1813 ( $\pm 32$ ) | <b>1838 (<math>\pm 42</math>)</b> |

Host **3** / NBu<sub>4</sub>Cl (CDCl<sub>3</sub>, 300 K) – [3]<sub>initial</sub> : 1.0 mM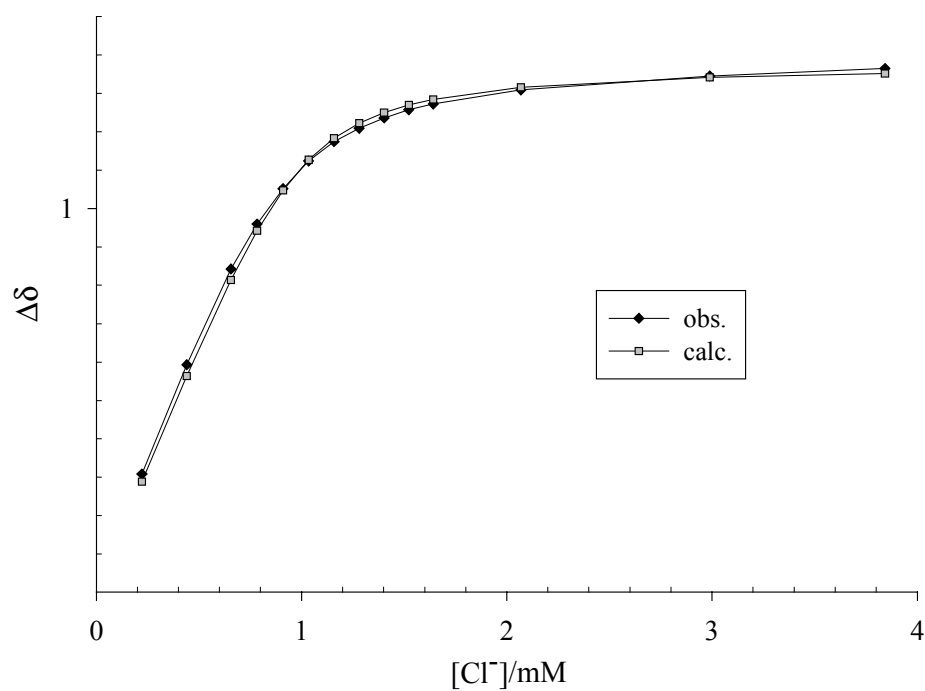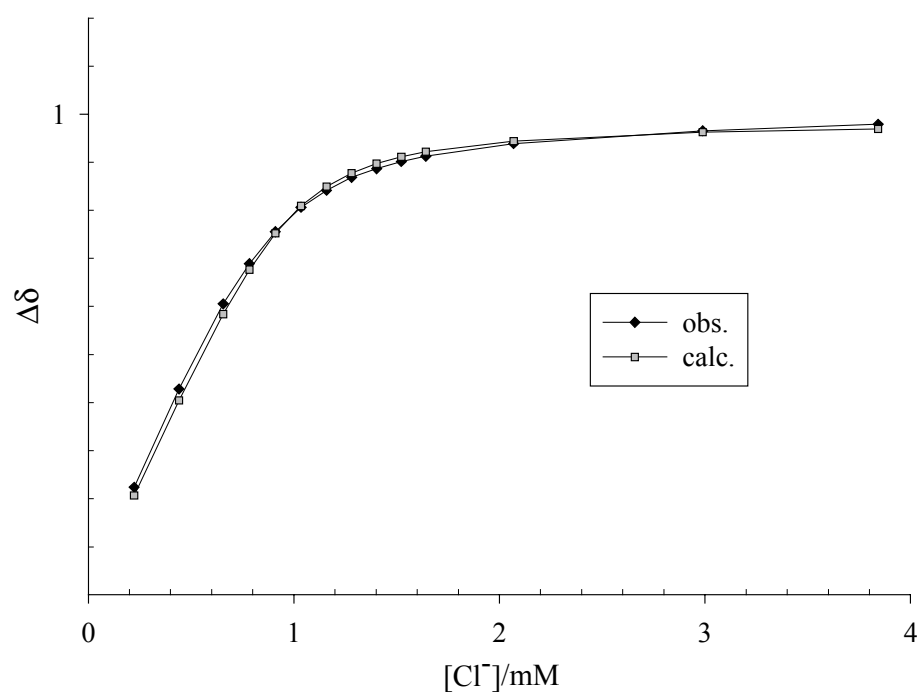

| Proton                                                          | upfield NH           | downfield            | mean                                 |
|-----------------------------------------------------------------|----------------------|----------------------|--------------------------------------|
| $K_{\text{ass } 1:1}/\text{M}^{-1}$ (Std.Err/ $\text{M}^{-1}$ ) | 18470 ( $\pm 2386$ ) | 18250 ( $\pm 2165$ ) | <b>18360 (<math>\pm 2276</math>)</b> |

Host **3** / NBu<sub>4</sub>Br (CDCl<sub>3</sub>, 300 K) – [3]<sub>initial</sub> : 1.0 mM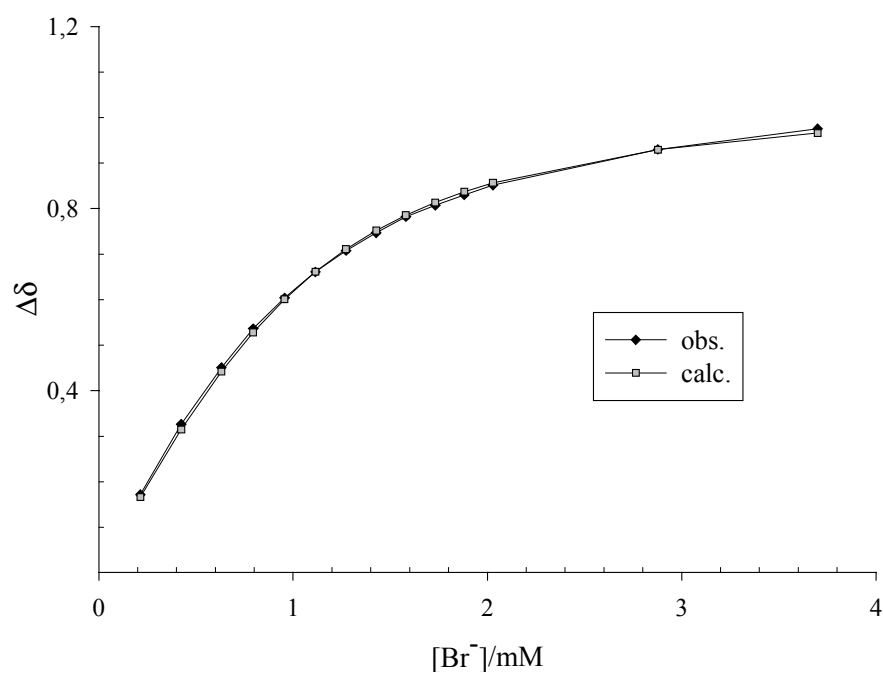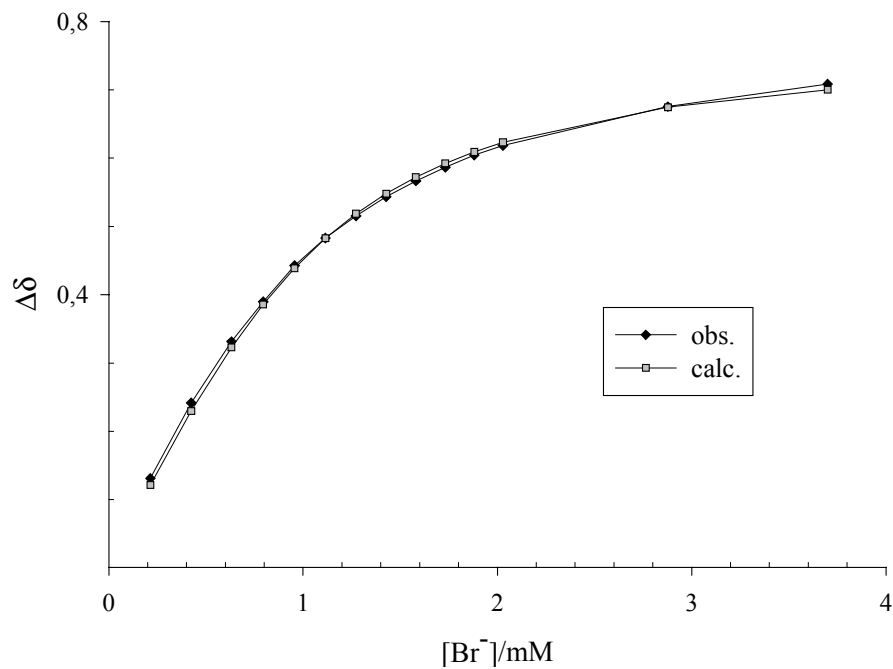

| Proton                                                          | upfield NH         | downfield          | mean                               |
|-----------------------------------------------------------------|--------------------|--------------------|------------------------------------|
| $K_{\text{ass } 1:1}/\text{M}^{-1}$ (Std.Err/ $\text{M}^{-1}$ ) | 3164 ( $\pm 184$ ) | 3039 ( $\pm 128$ ) | <b>3102 (<math>\pm 156</math>)</b> |



Host **3** / NBu<sub>4</sub>NO<sub>3</sub> (CDCl<sub>3</sub>, 300 K) – [3]<sub>initial</sub> : 1.0 mM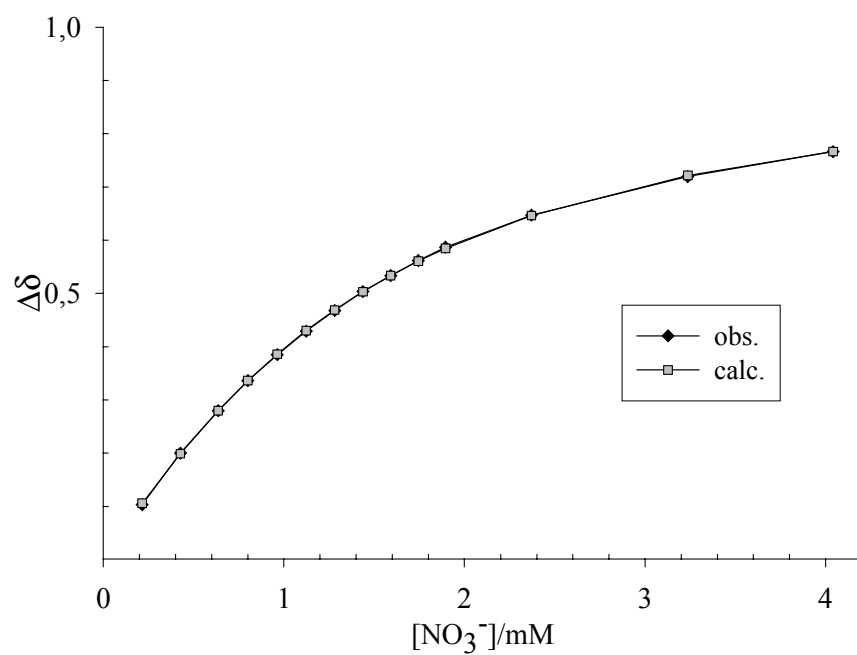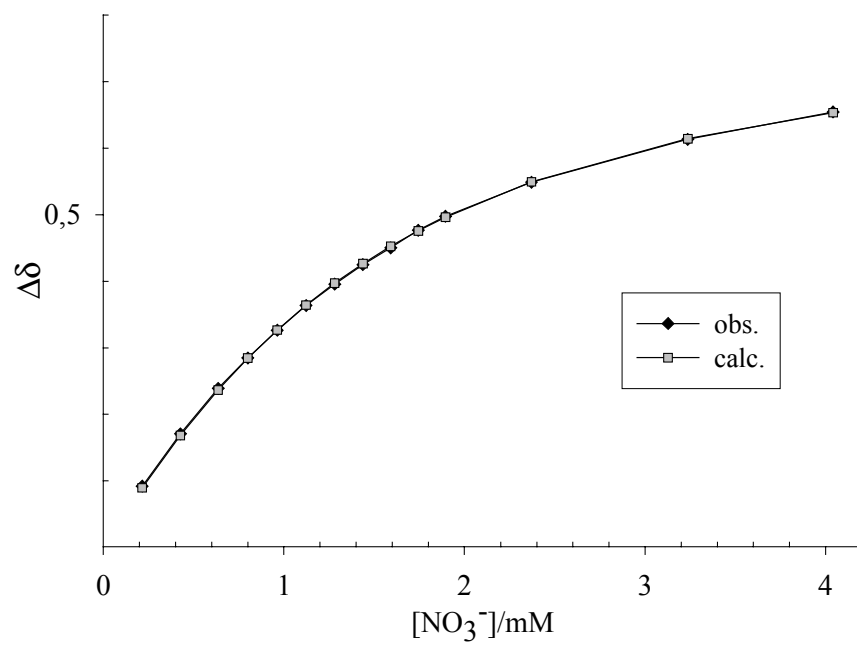

| Proton                                                          | upfield NH        | downfield         | mean                              |
|-----------------------------------------------------------------|-------------------|-------------------|-----------------------------------|
| $K_{\text{ass } 1:1}/\text{M}^{-1}$ (Std.Err/ $\text{M}^{-1}$ ) | 1129 ( $\pm 15$ ) | 1167 ( $\pm 11$ ) | <b>1148 (<math>\pm 13</math>)</b> |

Host **4** / NBu<sub>4</sub>Cl (CDCl<sub>3</sub>, 300 K) – [4]<sub>initial</sub> : 1.0 mM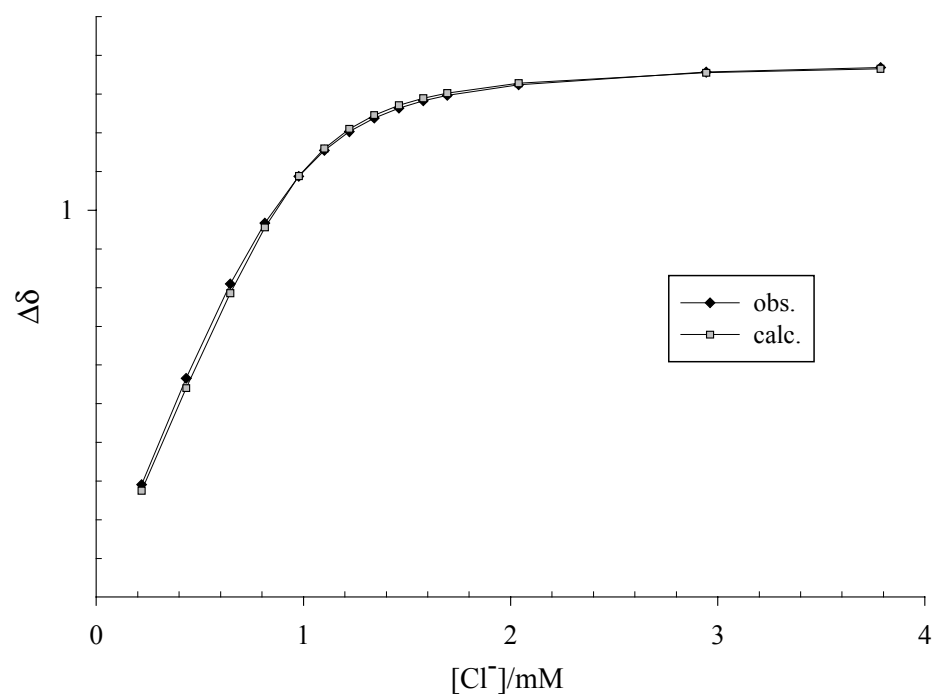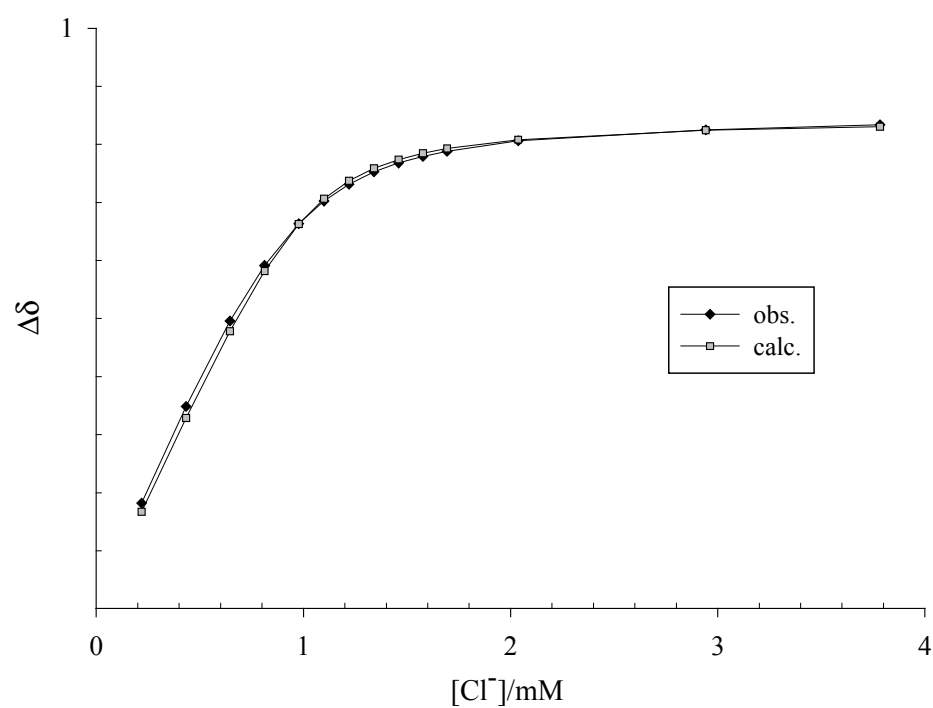

| Proton                                                          | upfield NH          | downfield           | mean                                 |
|-----------------------------------------------------------------|---------------------|---------------------|--------------------------------------|
| $K_{\text{ass } 1:1}/\text{M}^{-1}$ (Std.Err/ $\text{M}^{-1}$ ) | 19710 ( $\pm$ 2472) | 19330 ( $\pm$ 1841) | <b>19520 (<math>\pm</math> 2157)</b> |

Host **4** / NBu<sub>4</sub>Br (CDCl<sub>3</sub>, 300 K) – [4]<sub>initial</sub> : 1.0 mM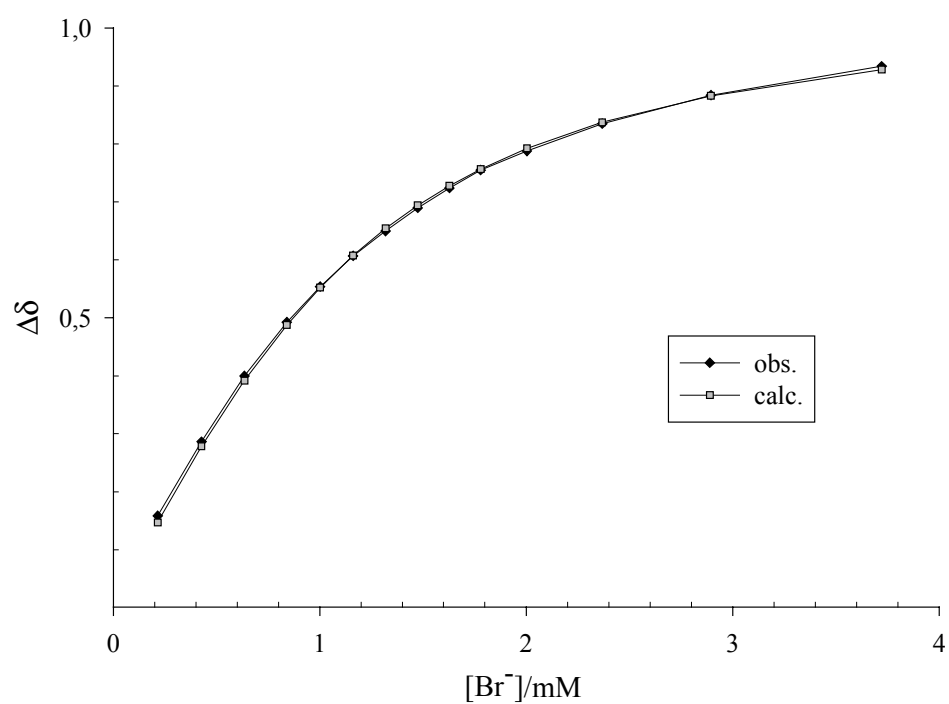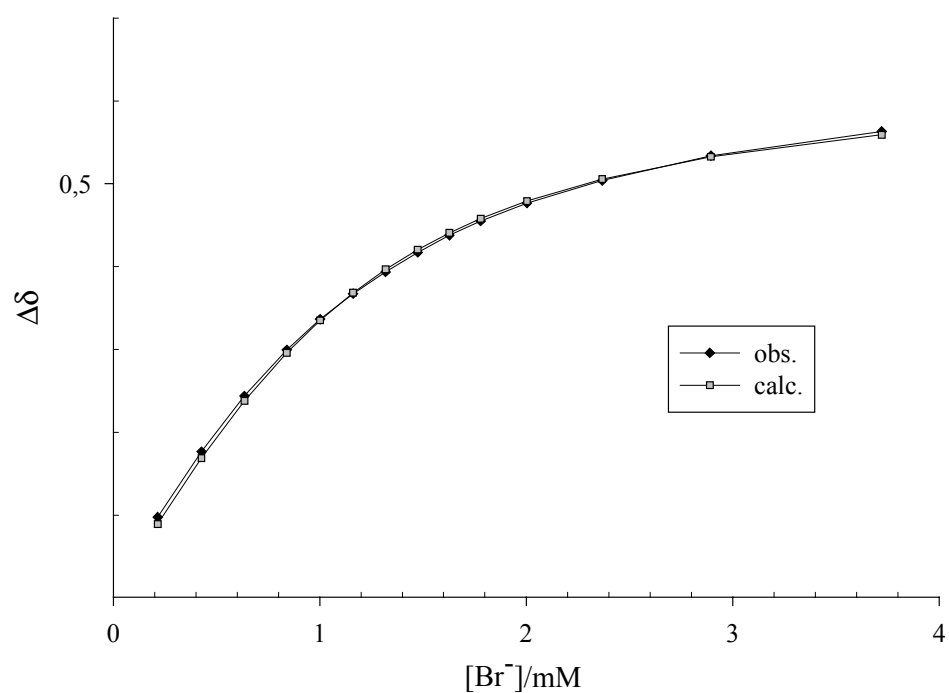

| Proton                                                          | upfield NH        | downfield        | mean                              |
|-----------------------------------------------------------------|-------------------|------------------|-----------------------------------|
| $K_{\text{ass } 1:1}/\text{M}^{-1}$ (Std.Err/ $\text{M}^{-1}$ ) | 2304 ( $\pm$ 110) | 2214 ( $\pm$ 78) | <b>2259 (<math>\pm</math> 94)</b> |

Host **4** / NBu<sub>4</sub>NO<sub>3</sub> (CDCl<sub>3</sub>, 300 K) – [4]<sub>initial</sub> : 1.0 mM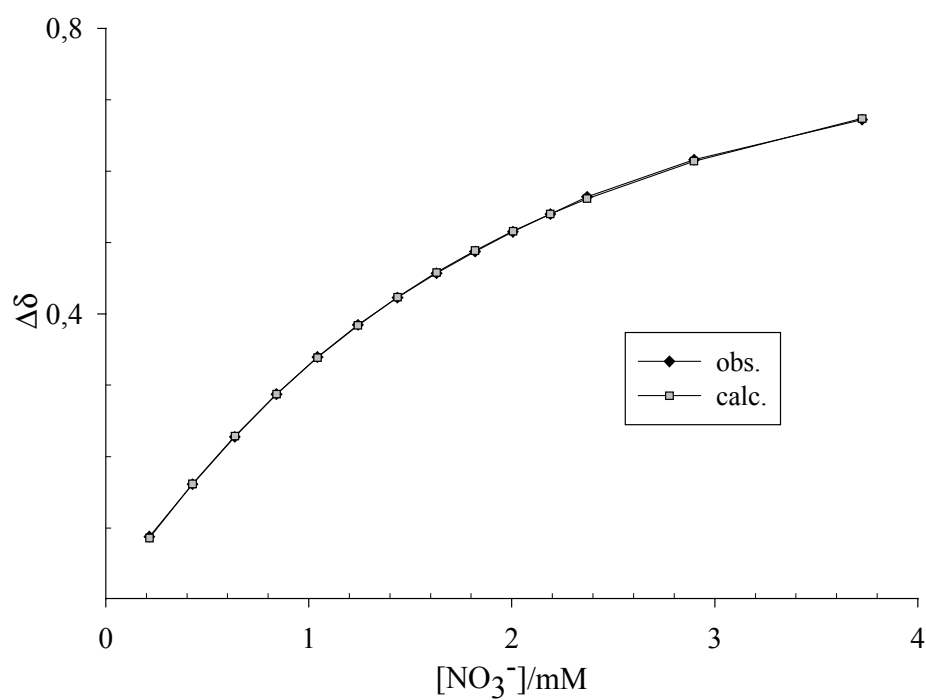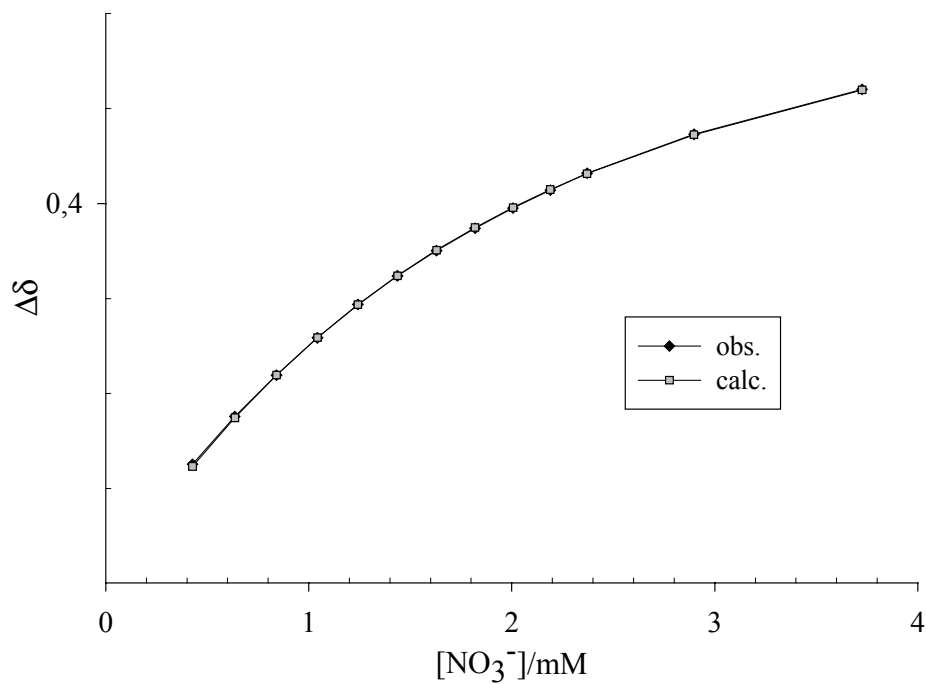

| Proton                                                          | upfield NH      | downfield        | mean                             |
|-----------------------------------------------------------------|-----------------|------------------|----------------------------------|
| $K_{\text{ass } 1:1}/\text{M}^{-1}$ (Std.Err/ $\text{M}^{-1}$ ) | 786 ( $\pm 9$ ) | 818 ( $\pm 10$ ) | <b>802 (<math>\pm 10</math>)</b> |
